# Supplementary material
Source: PubMed Central journal article supplement (PMC5373435)
Supplement: NIHMS71939-supplement-Supplementary_information.pdf [file NIHMS71939-supplement-Supplementary_information.pdf]

1 Supplementary Information

2

3 Antibody-independent mechanisms regulate the establishment of  
4 chronic *Plasmodium* infection

5

6 Thibaut Brugat<sup>1\*†</sup>, Adam James Reid<sup>2\*†</sup>, Jingwen Lin<sup>1</sup>, Deirdre Cunningham<sup>1</sup>, Irene  
7 Tumwine<sup>1</sup>, Garikai Kushinga<sup>1</sup>, Sarah McLaughlin<sup>1</sup>, Philip Spence<sup>4‡</sup>, Ulrike Böhme<sup>2</sup>,  
8 Mandy Sanders<sup>2</sup>, Solomon Conteh<sup>5</sup>, Ellen Bushell<sup>2</sup>, Tom Metcalf<sup>2</sup>, Oliver Billker<sup>2</sup>,  
9 Patrick E. Duffy<sup>5</sup>, Chris Newbold<sup>2,3</sup>, Matthew Berriman<sup>2</sup> & Jean Langhorne<sup>1\*</sup>.

10

11 <sup>1</sup> The Francis Crick institute, London NW1 1AT, UK.

12 <sup>2</sup> Wellcome Trust Sanger Institute, Hinxton, Cambridge CB10 1SA, UK.

13 <sup>3</sup> Weatherall Institute of Molecular Medicine, Oxford OX3 9DS, UK

14 <sup>4</sup> MRC National Institute for Medical Research, London NW7 1AA, UK.

15 <sup>5</sup> Laboratory of Malaria Immunology and Vaccinology, National Institute of Allergy and  
16 Infectious Diseases, National Institutes of Health, Rockville, MD, United States of  
17 America.

18

19 †These authors contributed equally to the work

20 \*Corresponding Authors: Jean Langhorne and Thibaut Brugat, Francis Crick institute,  
21 London NW1 1AT. [jean.langhorne@crick.ac.uk](mailto:jean.langhorne@crick.ac.uk) and [thibaut.brugat@crick.ac.uk](mailto:thibaut.brugat@crick.ac.uk), tel: +44  
22 208 816 2558; Adam James Reid, Wellcome Trust Sanger Institute, Genome Campus,  
23 Hinxton, Cambridgeshire, CB10 1SA. [ar11@sanger.ac.uk](mailto:ar11@sanger.ac.uk), tel: +44 1223 494810.

24 ‡Present Address: Institute of Immunology and Infection Research (IIR), School of  
25 Biological Sciences, The University of Edinburgh, United Kingdom

26

27 **Supplementary Figures**  
28

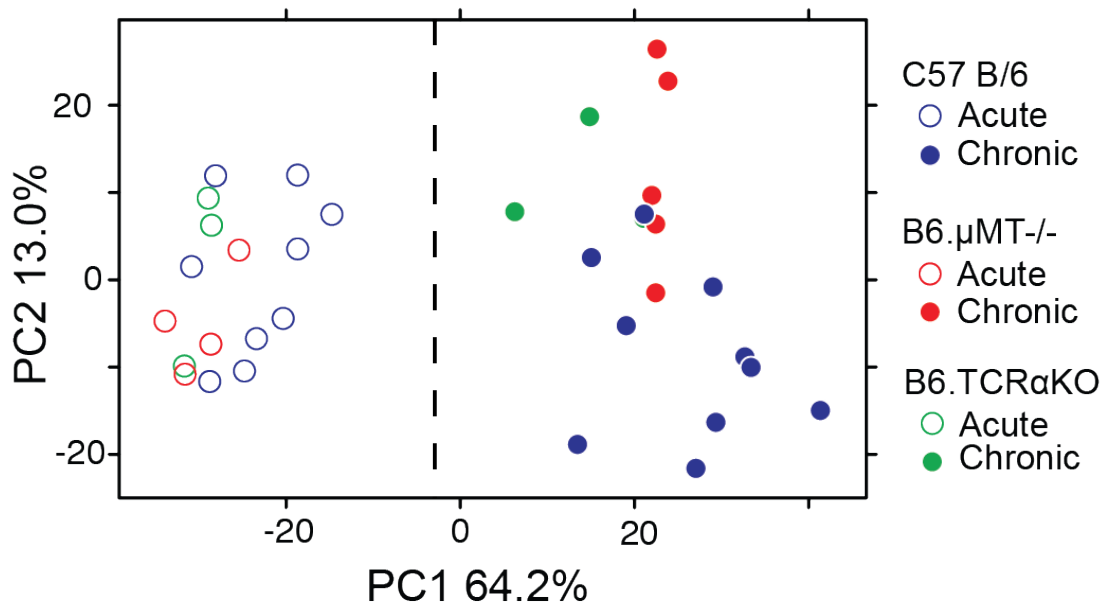

29  
30

31 **Supplementary Figure 1. Principal Components Analysis plot of transcriptomes**  
32 **from *P. chabaudi* AS parasites collected at acute and chronic phases of infection in**  
33 **wild-type and mutant mice.** Wild-type C57Bl/6 (blue), B6.µMT-/- (red) and TCRα-/-  
34 (green) mice were infected by mosquito bites. Parasite mRNA were collected during the  
35 acute (open circles) and chronic (close circles) of infection. Gene expression does not differ  
36 greatly between parasites in wild-type (blue), µMT-/- (red) or TCRαKO (green) mice. Changes  
37 between the acute and chronic phases are consistent between the three genetic backgrounds.

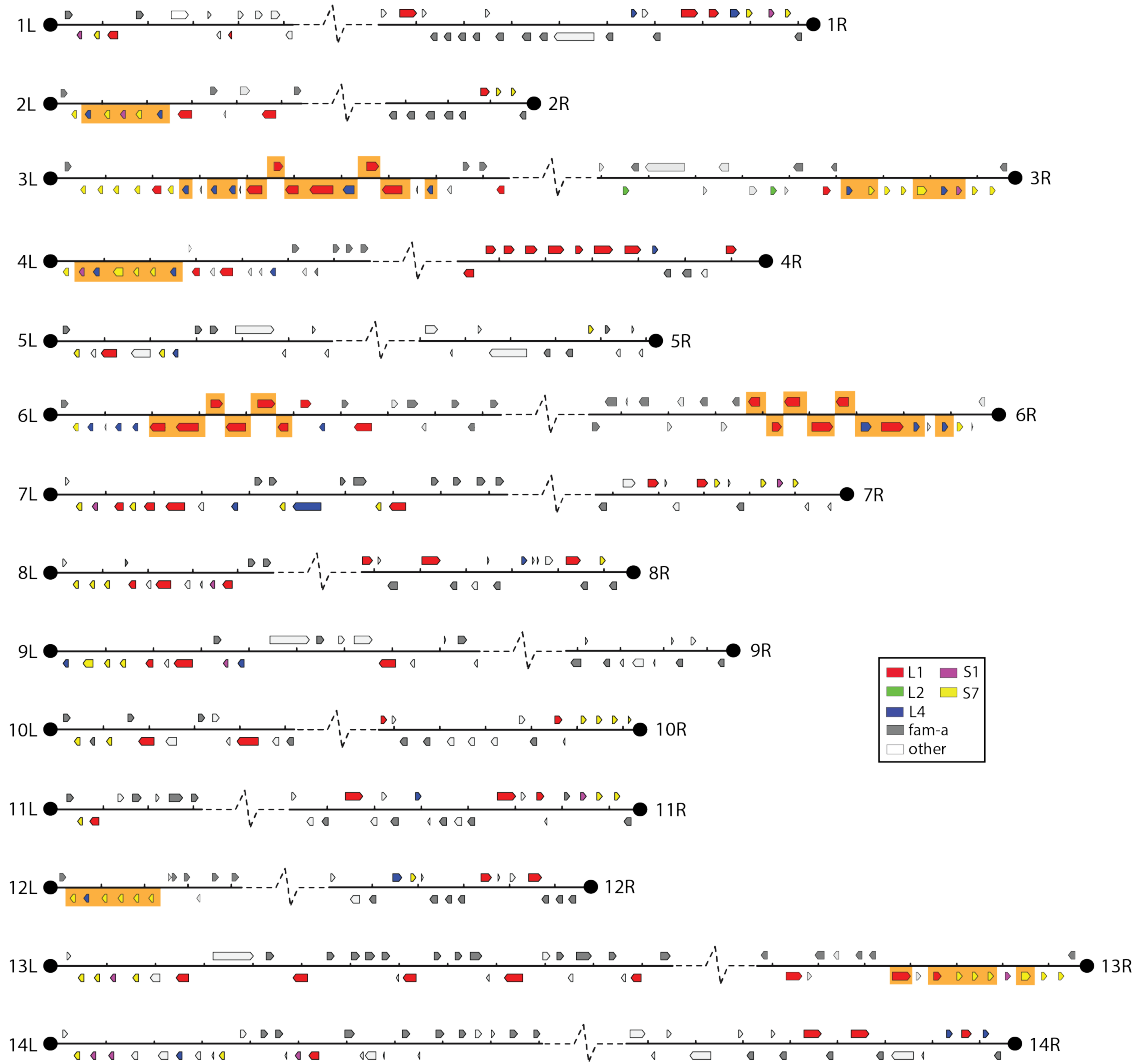

38

39

40 **Supplementary Figure 2. Structure of all subtelomeres in the v3 *P. chabaudi* AS**

41 **genome assembly**

42 *Pir* genes are shown in the context of the subtelomeric region from the telomeric repeats

43 to the last *pir* or *fam-a* gene. Those genes co-expressed across mice over the course of

44 infection are highlighted in orange. Genes are coloured by subfamily.



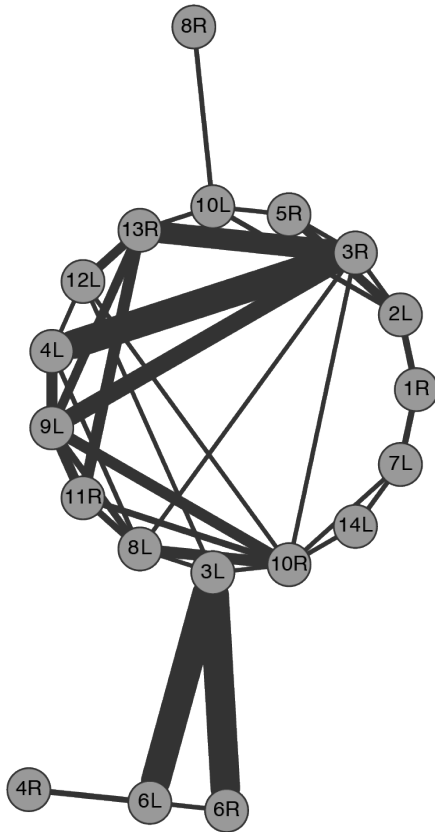

45  
46  
47

**Supplementary Figure 3. Similarity of *pir* genes between different subteleromeres.**

48 Protein sequences for all *pir* genes were BLASTed against each other (blastall 2.2.25; E  
49  $\geq 0.01$ ; sequence identity  $\geq 80\%$ ). Matches between a node and itself were ignored.  
50 For any two nodes the greatest match length was taken, rather than summing the match  
51 lengths for the two nodes. For each pair of subteleromeres, the total length of the hits was  
52 determined and used as the edge weight in the graph. Edges with  $<300$  amino acids were  
53 excluded. The maximum number of amino acids was 1972. The figure shows two  
54 particularly similar arrays of *pir* genes: L1-rich 3L, 6L, 6R and S7-rich 3R, 13R, 4L and  
55 9L. Visual inspection of the subteleromeres suggests that 4R is similarly rich in L1 *pirs* as  
56 the first group, while 12L and 2L are rich in S7s like the latter group. 3L has both L1-rich  
57 and S7-rich regions, which explains why it links the two principal subteleromere types.

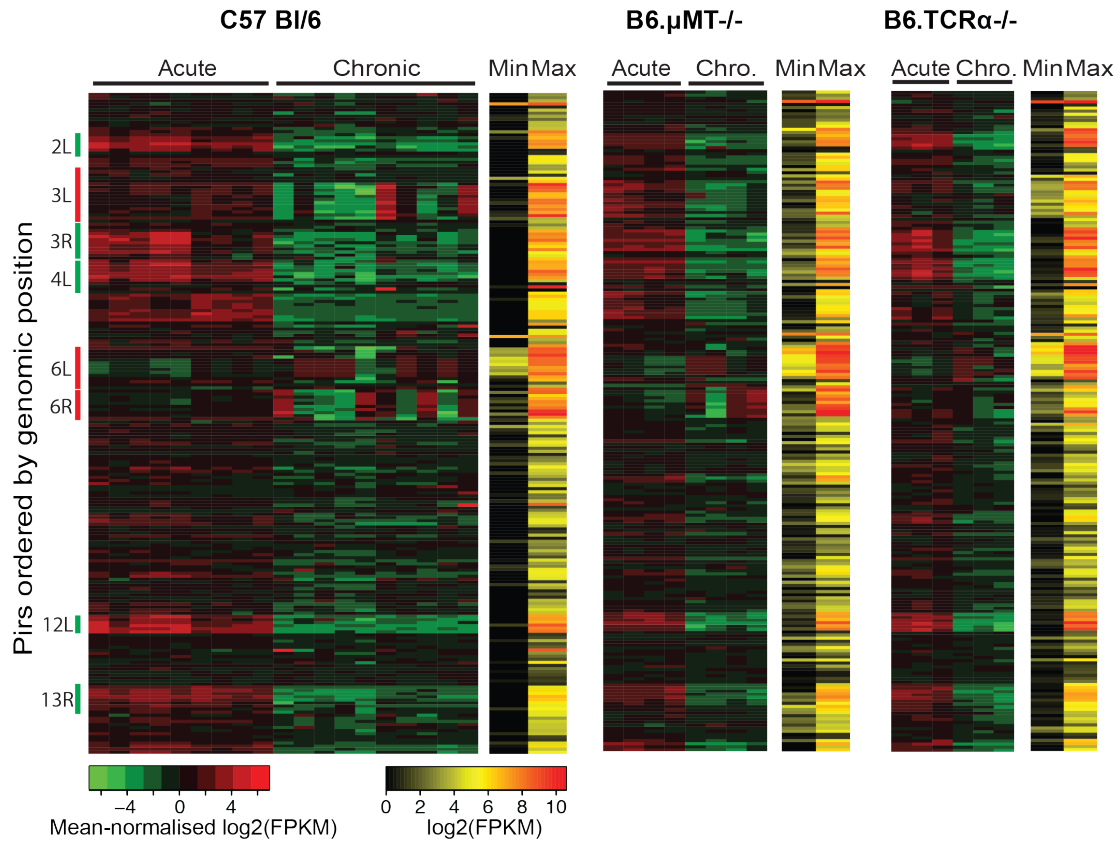

58

59

60 **Supplementary Figure 4. Heatmap of *Pir* gene expression at ChAPL and AAPL loci.**

61 10 wild-type C57Bl/6 mice, 5 B6.µMT<sup>-/-</sup> mice and 3 TCRα<sup>-/-</sup> mice were infected by

62 mosquito bites. Each column represents values obtained from an individual mouse. The

63 first nine columns represent samples collected during the acute phase. The next ten

64 columns represent samples collected during the chronic phase. *Pir* genes were ordered by

65 their position in the genome. On the side, numbers indicate chromosomes and letters

66 indicate the location on that chromosome: L for left hand end, R for right hand end.

67 ChAPLs and AAPLs are highlighted. For each gene, red represents its maximal

68 expression, green its minimal expression. The maximum and minimum values for each

69 gene are shown in a separate heatmap.

70

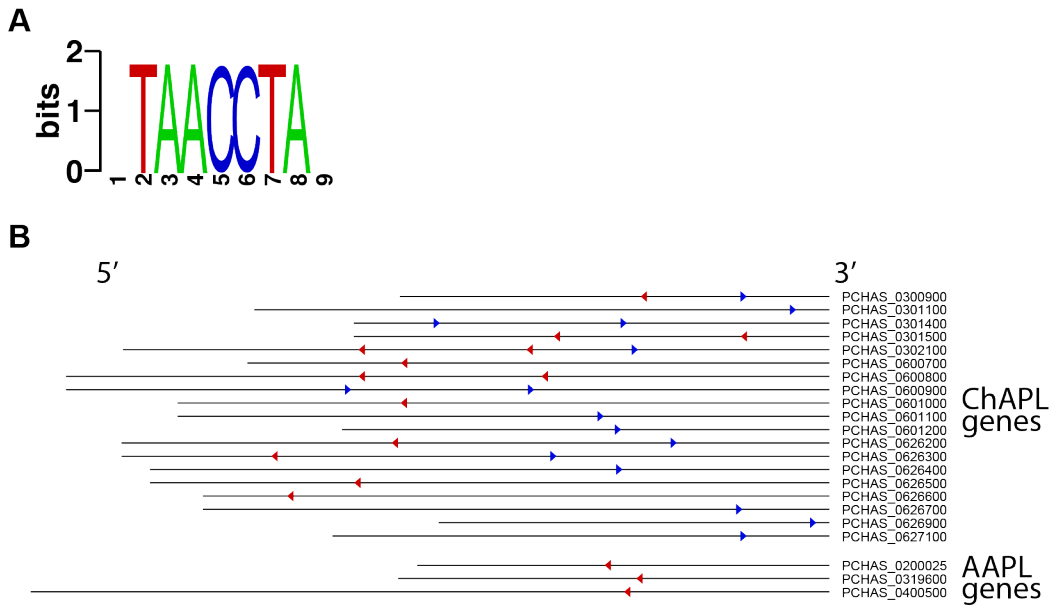

71  
72 **Supplementary Figure 5. A DNA sequence motif associated with the upstream,**  
73 **intergenic regions of ChAPL genes.** (A) Sequence logo of the identified motif. Z-score  
74 23.9, robustness 7/10 (B) Motif location in intergenic region (excluding UTRs) upstream  
75 of *pir* genes from ChAPLs and AAPLs. Blue arrows indicate an instance of the  
76 TAACCTA motif on the forward strand, red arrows the reverse strand. The motif occurs  
77 in 19/27 ChAPL genes tested. Reliable upstream intergenic regions could not be  
78 determined for all genes: there are a total of 32 ChAPL and 28 AAPL genes. The motif  
79 rarely occurs upstream of AAPL genes (3/22 tested) and only in the reverse orientation.  
80 Motifs in the forward orientation tend to occur closer to the transcription start site (TSS)  
81 of the gene, whereas those in the reverse orientation are more distal to the TSS.

### A C57 Bl/6

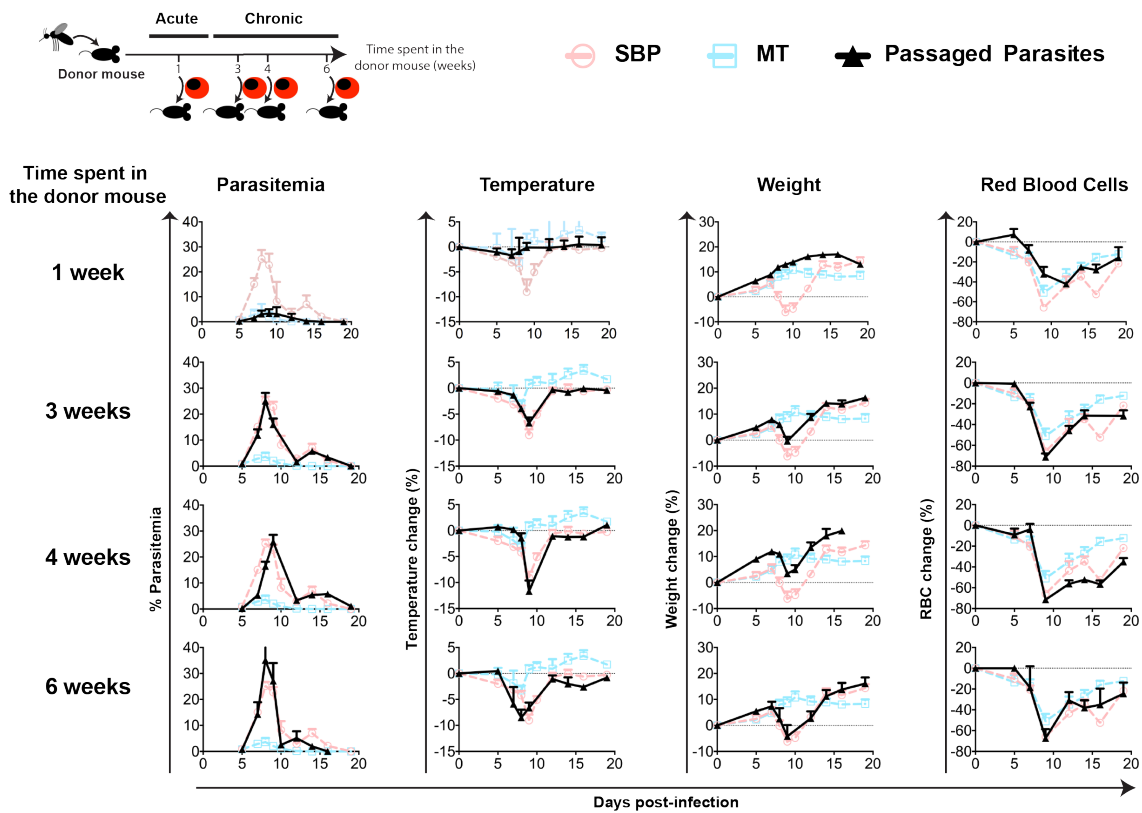

### B B6.μMT<sup>-/-</sup>

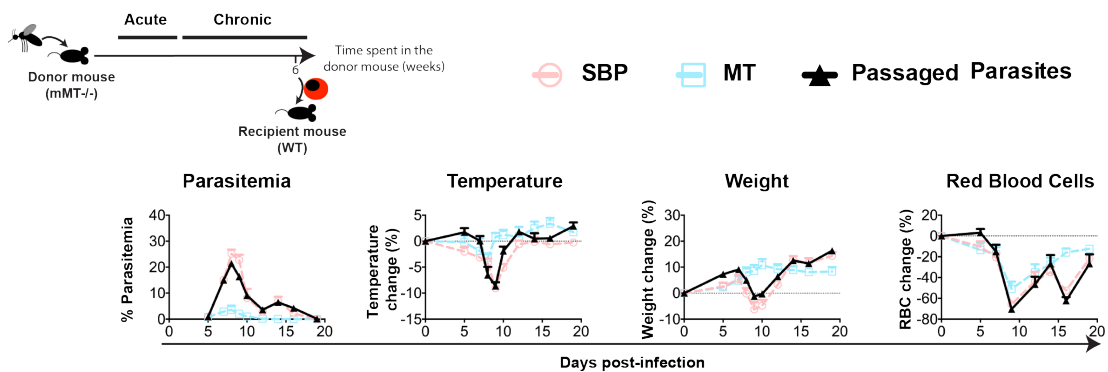

83

84 **Supplementary Figure 6. Course of infections initiated with acute and chronic**  
 85 **parasites**

86 (A) Wild-type C57Bl/6 donor mice were infected by mosquito bites and parasites were  
 87 subsequently passaged into naïve recipient mice after one, three, four or six weeks (n=15

88 mice per group). (B) B6.μMT donor mice were infected by mosquito bites and parasites  
89 were passaged into naïve wild type recipient mice after six weeks (n= 5 mice). For both  
90 experiments, we show parasitaemia and changes in temperature, weight, and red blood  
91 cell density over the course of infection in recipient mice compared to wild type mice  
92 directly infected by mosquito bites (MT; light blue dotted line) or with serially blood  
93 passaged parasites (SBP; light red dotted line). Each dot represents the average  $\pm$ SEM.

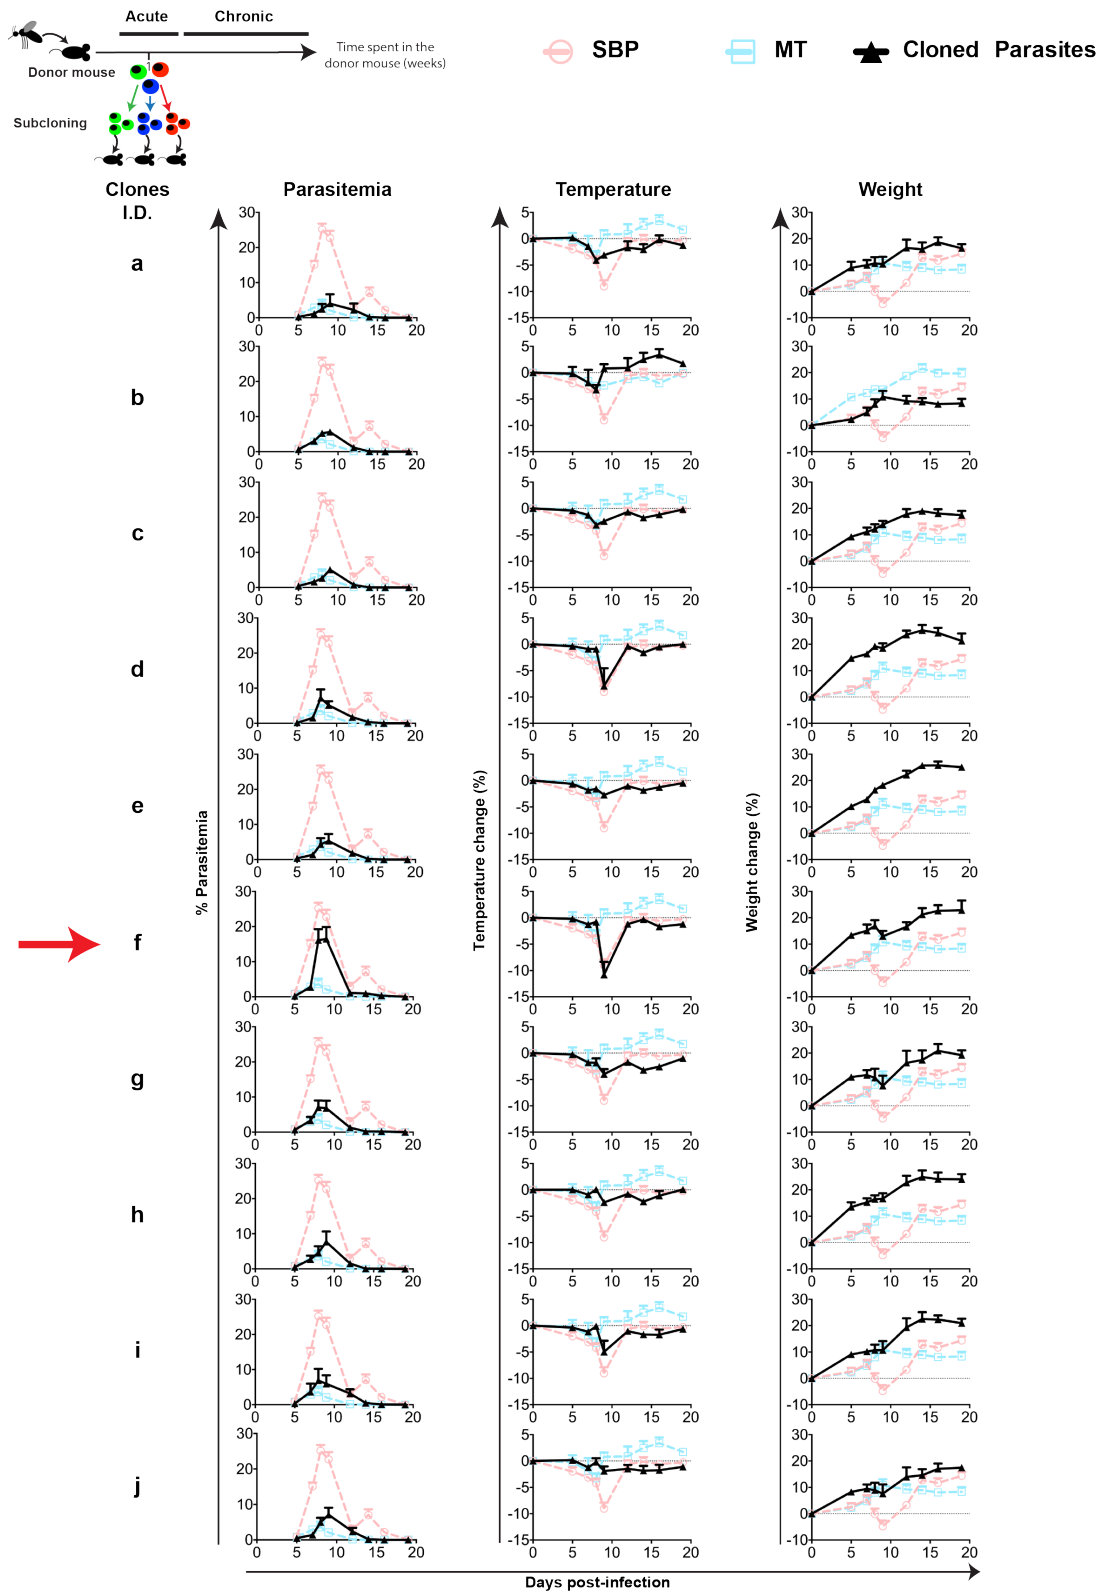

97 **Supplementary Figure 7. Course of infections initiated with acute clones**

98 One donor mouse was infected by mosquito bites. Individual *P. chabaudi* AS parasites  
99 were subsequently cloned during the acute phase of infection. After their expansion,  
100 recipient mice were infected with clonal populations of parasites (n= 5 mice per group).  
101 For each clonal infection, we show parasitaemia and changes in temperature and weight  
102 over the course of infection in recipient mice compared to mice directly infected by  
103 mosquito bites (MT; light blue dotted line) or with serially blood passaged parasites  
104 (SBP; light red dotted line). Each dot represents the average  $\pm$ SEM. The red arrow  
105 indicates the clone derived from the acute phase that reached relatively high parasitaemia  
106 and induced significant temperature loss in naïve mice.

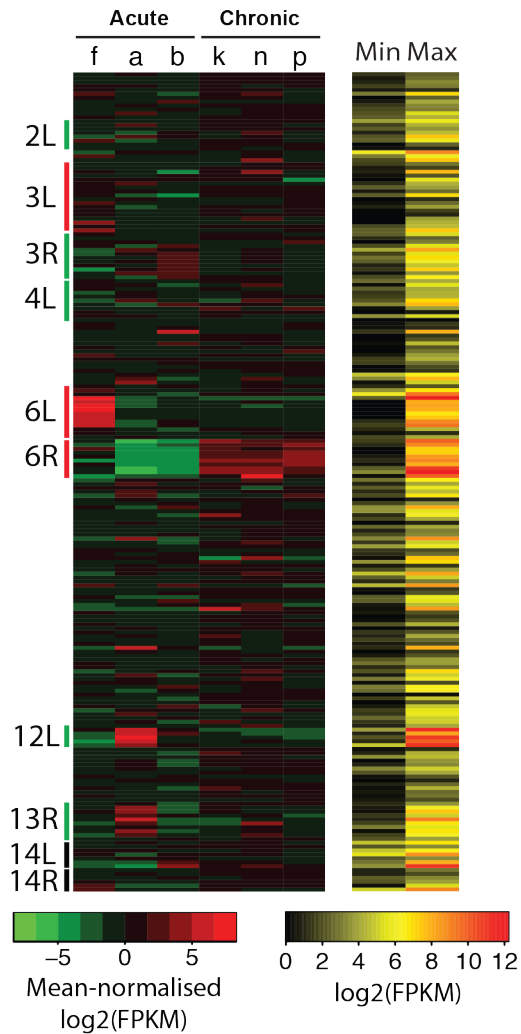

107  
108

109 **Supplementary Figure 8. Heatmap of *pir* gene expression at ChAPLs and AAPLs in**  
110 **three acute and three chronic clones.**

111 One donor mouse was infected by mosquito bites. Individual *P. chabaudi* AS parasites  
112 were subsequently cloned during the acute and chronic phase of infection. After their  
113 expansion, recipient mice were infected with clonal populations of parasites (n= 3 mice  
114 per group). For each clonal infection, parasite RNA were extracted during the late  
115 trophozoite stage after completion of seven cycles of schizogony. Each column represents  
116 the values obtained from 3 individual mice infected with the same clonal population of



117 parasites. The first three columns represent clones from the acute phase, the next three  
118 columns represent clones from the chronic phase. *Pir* genes were ordered by their  
119 position in the genome. On the side, chromosomes numbers are indicated as well as the  
120 location on that chromosome: L for left hand, R for right hand. ChAPLs and AAPLs are  
121 highlighted. For each gene, red represents its maximal expression, green its minimal  
122 expression. The maximum and minimum values for each gene are shown in a separate  
123 heatmap.  
124

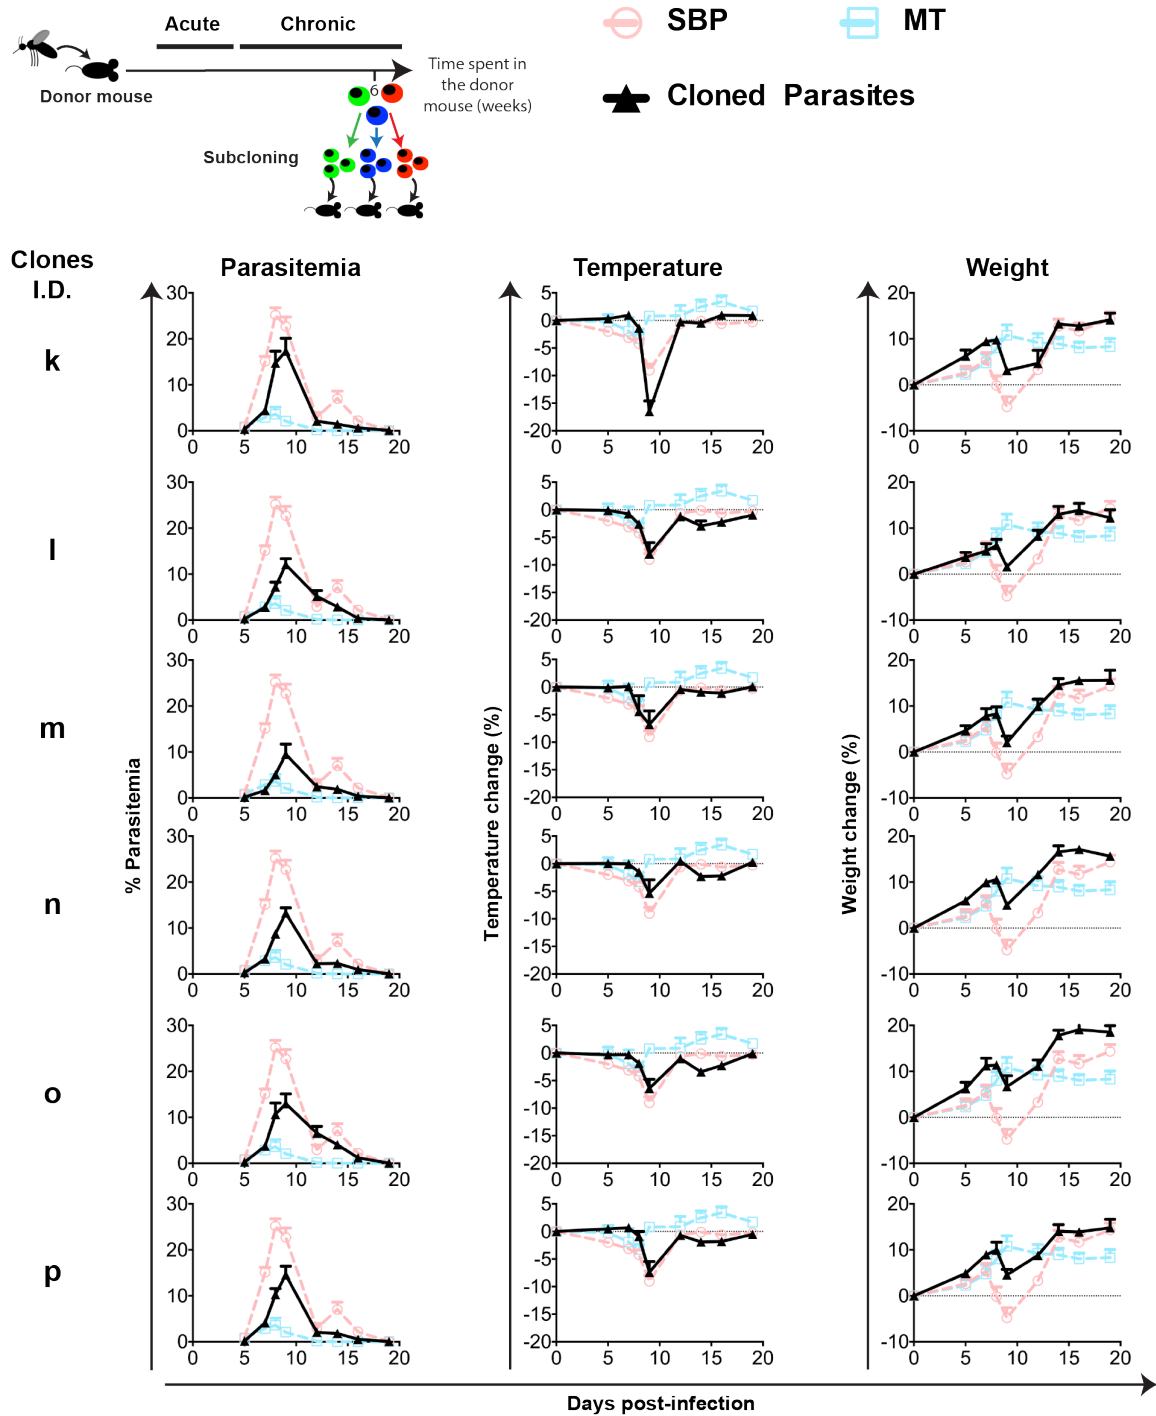

126  
127

**Supplementary Figure 9. Course of infection in mice infected with chronic clones**

128 One donor mouse was infected by mosquito bites. Individual parasites were subsequently

129 cloned during the chronic phase of infection. After their expansion, recipient mice were

130 infected with clonal populations of parasites (n= 5 mice per group). For each clonal  
131 infection, we show parasitaemia and changes in temperature and weight over the course  
132 of infection in recipient mice compared to mice directly infected by mosquito bites (MT;  
133 light blue dotted line) or with serially blood passaged parasites (SBP; light red dotted  
134 line). Each dot represents the average  $\pm$ SEM.

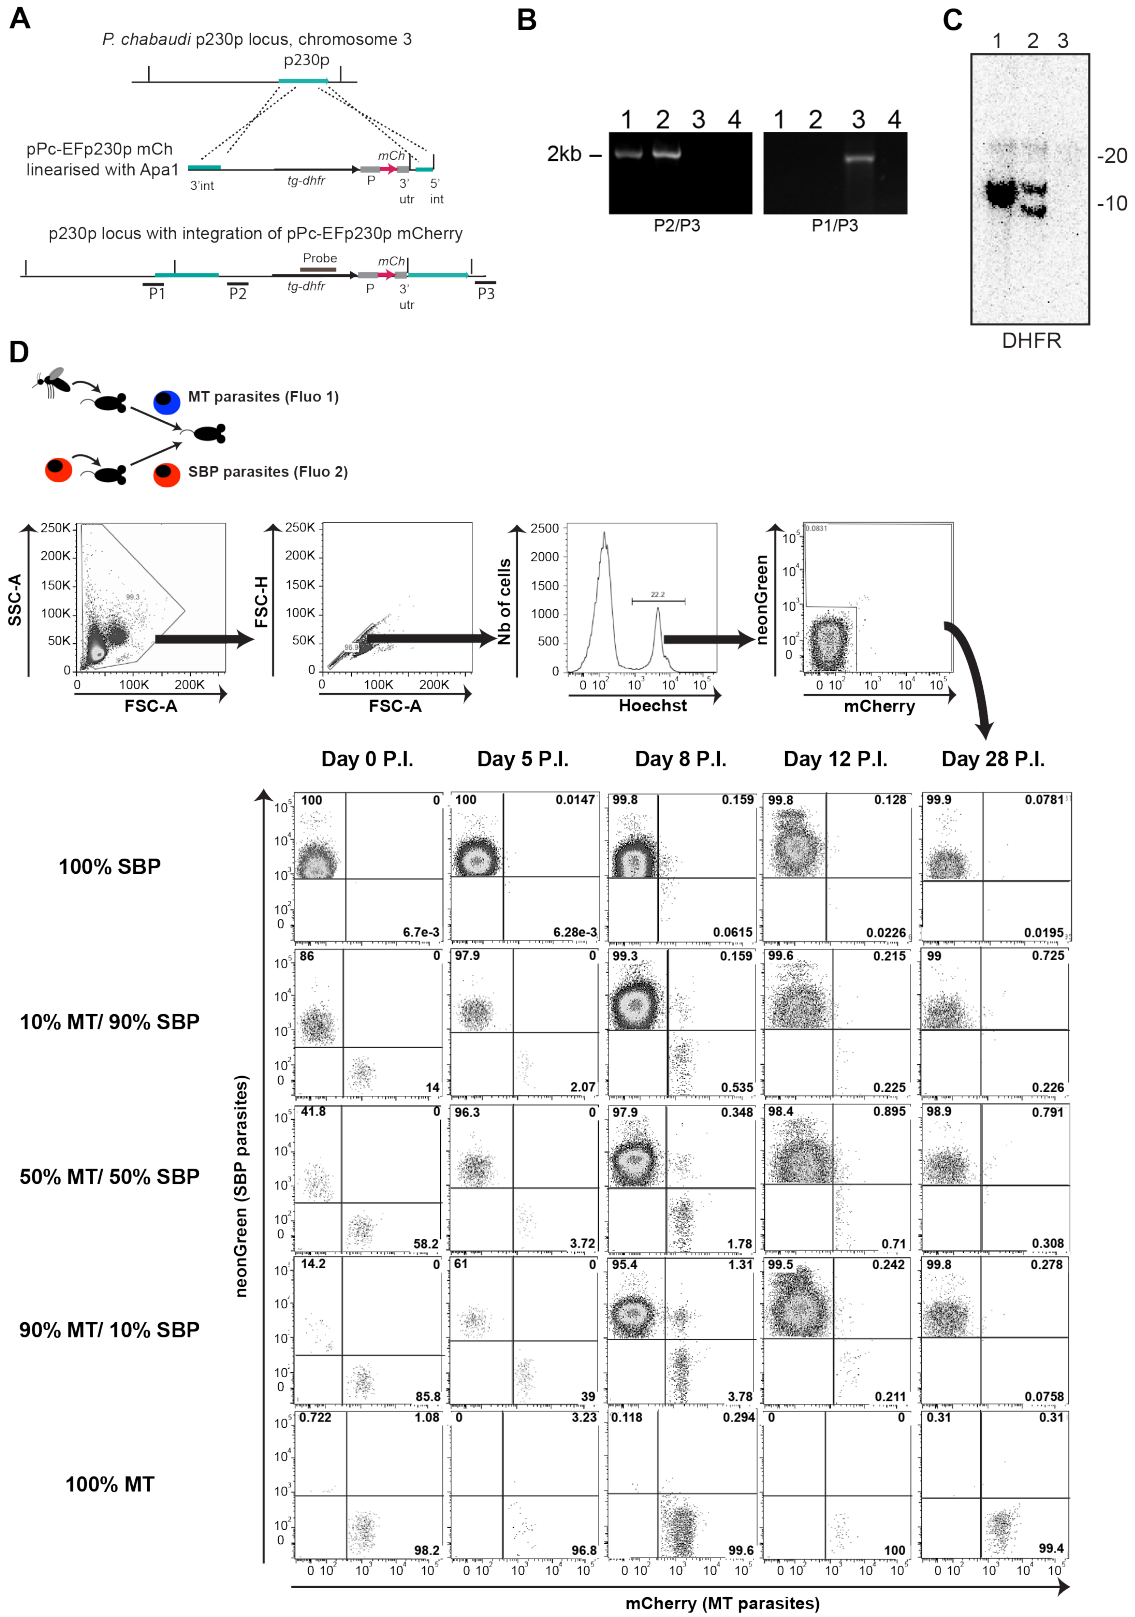

136 **Supplementary Figure 10. Generation of, and competition between mCherry-tagged**  
137 **MT parasites and NeonGreen-tagged SBP parasites.**

138 (A) The modified p230p locus of chromosome 3 (illustrated for *PcEFp230p\_mCherry*)  
139 and the location of PCR primers used to verify integration. (B) PCR verification of  
140 integration. Integration of the plasmid was verified with primer set P2/P3 and the loss of  
141 the wild type locus shown using primer set P1/P3. Lanes 1-4 contain samples from  
142 parasites transfected with *PcEFp230p\_mCherry* (1), *PcEFp230p\_mNeonGreen* (2), *PcAS*  
143 wild type parasites (3), water control (4). (C) Southern Blot analysis of EcoRV digested  
144 genomic DNA to show integration of *PcEFp230p\_mNeonGreen* and  
145 *PcEFp230p\_mCherry*. lane 1, *PcEFp230p\_mNeonGreen*; lane 2, *PcEFp230p\_mCherry*,  
146 lane 3 wild-type DNA. TgDHFR probe hybridises to restriction fragments of 12.3 kb and  
147 12.4kb (lane 1) and 9.8 kb and 10.7 kb (lane 2), showing integration (12.3 kb; 9.8 kb) and  
148 linearised plasmid (12.4; 10.7) hybrids, respectively. (D) mCherry (Fluo 1) tagged  
149 parasites were Mosquito-Transmitted (MT), and neonGreen (Fluo 2) tagged parasites  
150 were Serially Blood-Passaged (SBP). Different proportions of the two were used to infect  
151 recipient mice by IP injection of  $10^5$  parasites (n= 10 mice per group). We show the  
152 percentages of parasites being SBP or MT as defined by flow cytometry at days 0, 5, 8,  
153 12 and 28 post-infection (P.I.).

**A Transfected parasites**      ○ 100% SBP    □ 100% MT    ▲ Mixed Infections

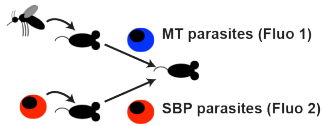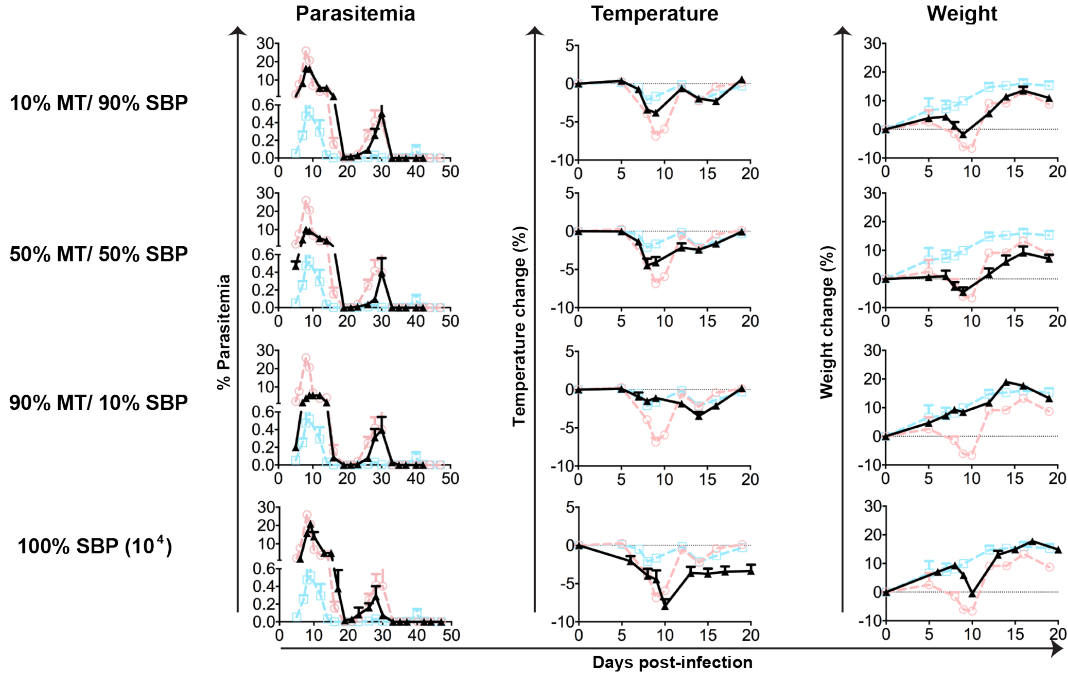

**B Wild type parasites**

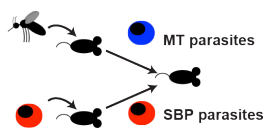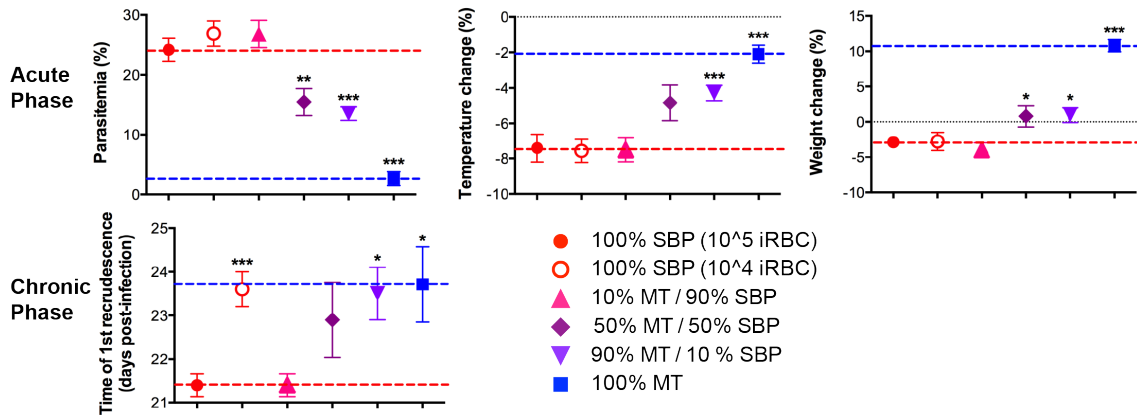

154

155 **Supplementary Figure 11. Course of mixed infections performed with transgenic**  
 156 **and wild type parasites.**

157 (A) mCherry (Fluo 1) tagged parasites were Mosquito-Transmitted (MT), and neonGreen  
158 (Fluo 2) tagged parasites were Serially Blood-Passaged (SBP). Different proportions of  
159 the two were used to infect recipient mice by IP injection of  $10^5$  parasites (n= 10 mice per  
160 group). As a control, a group of recipient mice was infected by IP injection of  $10^4$  SBP  
161 parasites. We show the parasitaemia and changes in temperature and weight change over  
162 the course of infection for each group compared to mice infected with 100% MT  
163 parasites (light blue dotted line) or 100% SBP parasites (light red dotted line). Each dot  
164 represents the average  $\pm$ SEM. (B) The same experiment was performed with wild type  
165 MT and SBP parasites. We show maximum parasitaemia, temperature change, weight  
166 change (upper panel) and time of recrudescence (lower panel) for each group and for  
167 mice infected with 100% MT parasites (blue dotted line) or 100% SBP parasites (red  
168 dotted line). Each dot represents the average  $\pm$ SEM. Each group has been compared to  
169 mice infected with  $10^5$  SBP parasites (\* $P$ <0,05; \*\* $P$ <0,01; \*\*\* $P$ <0,001, two-sided Mann  
170 Whitney Test).

171

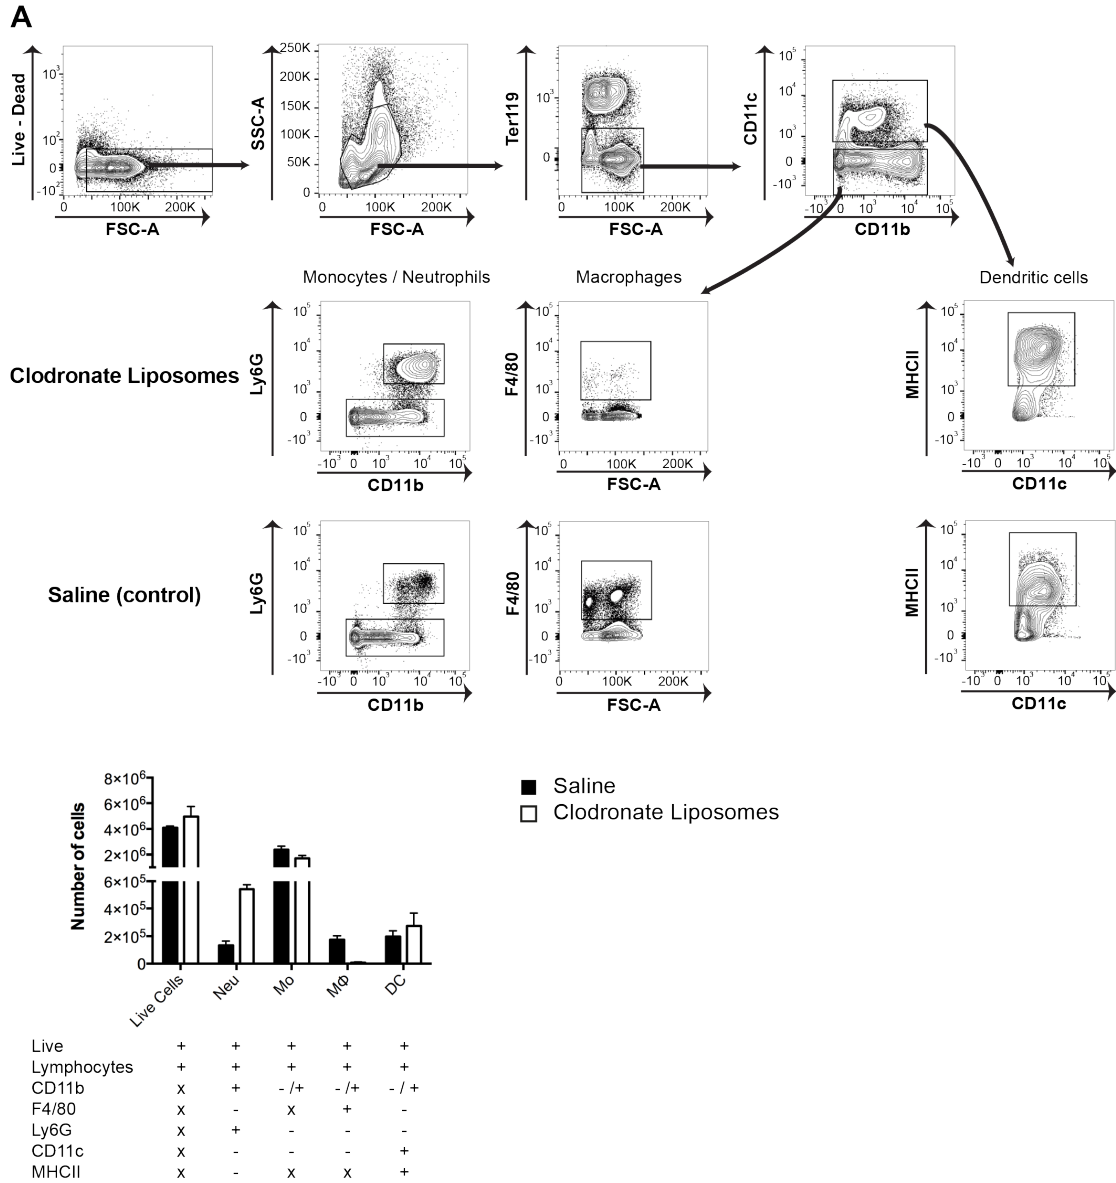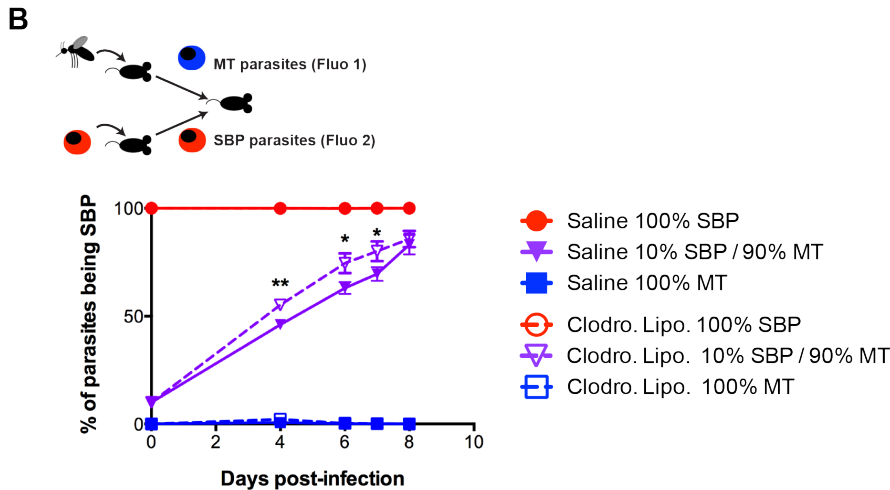



173 **Supplementary Figure 12: Competition between SBP and MT parasites in mice**  
174 **deficient of T-, B- and phagocytic cells.**

175 (A) Flow cytometric analysis was performed on splenocytes from B6.RAG-1<sup>-/-</sup> mice  
176 mice 24h after treatment with clodronate liposomes or saline (n=2 per group). The bars  
177 represent the total number of each cell type. Gating strategies are shown for Neutrophils  
178 (Neu), Monocytes (Mo); Macrophages (MΦ) and Dendritic cells (DC) on the plots and  
179 below the chart. (B) mCherry (Fluo 1) tagged parasites were Mosquito-Transmitted  
180 (MT), and mNeonGreen (Fluo 2) tagged parasites were Serially Blood-Passaged (SBP).  
181 Different proportions of the two were used to infect recipient mice (B6.RAG-1<sup>-/-</sup> mice  
182 treated with saline or clodronate liposomes) by i.p. injection of 10<sup>5</sup> parasites (n= 5 mice  
183 per group). The percentage of parasites being SBP (as determined by flow cytometry) is  
184 indicated. Each dot represents the average ± standard error of the mean (SEM).

185

186

**A** *P. chabaudi* CB in C57 Bl/6 mice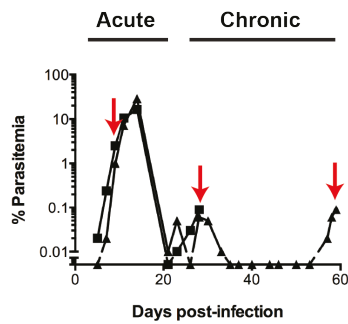**B** *P. chabaudi* AS in *Grammomys sudaster* rats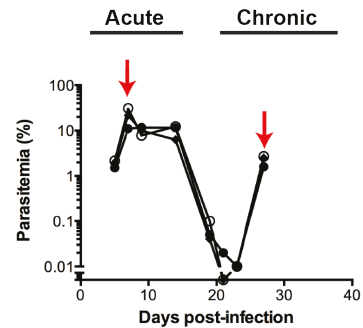**C** *P. chabaudi* CB in C57BL/6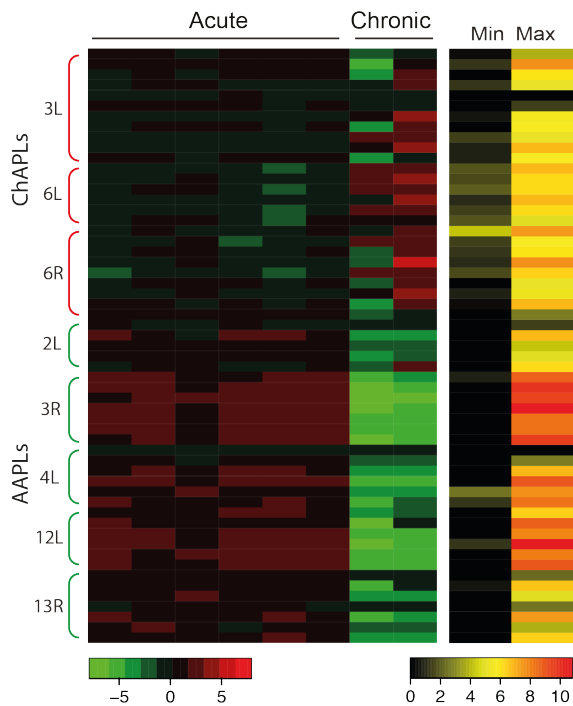**D** *P. chabaudi* AS in thicket rat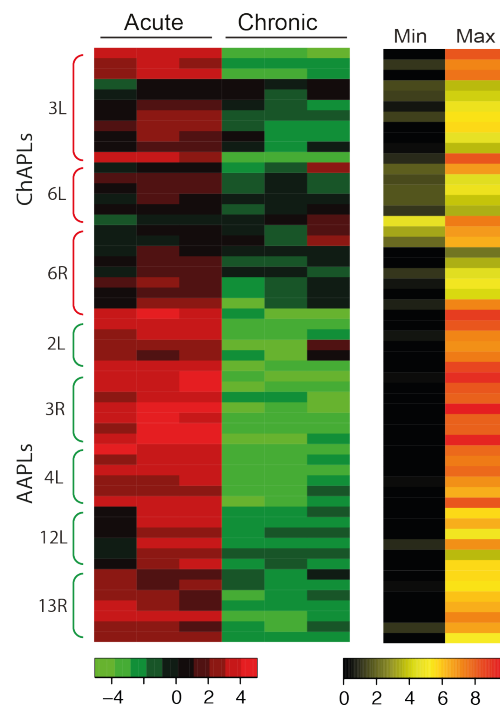

188

189

190 **Supplementary Figure 13. Chronic *pir* gene expression in alternative *P. chabaudi***  
 191 **host-parasite systems.**

192 (A) Course of infection of *P. chabaudi* CB in C57Bl/6 mice. Samples were taken where  
 193 indicated with a red arrow. (B) Course of infection of *P. chabaudi* AS in *Grammomys*

194 surdater. (C) The CB isolate of *P. chabaudi* has a very similar genome sequence to that of  
195 the AS isolate. We observed that the orthologous AAPLs and ChAPLs behave in a very  
196 similar way, with 6L and 6R highly expressed during the chronic infection, while AAPL  
197 loci were much reduced in expression. (D) Infections of thicket rats with *P. chabaudi* AS  
198 again highlighted lower expression of AAPLs and higher expression of ChAPLs during  
199 the chronic stage of infection.

200

201

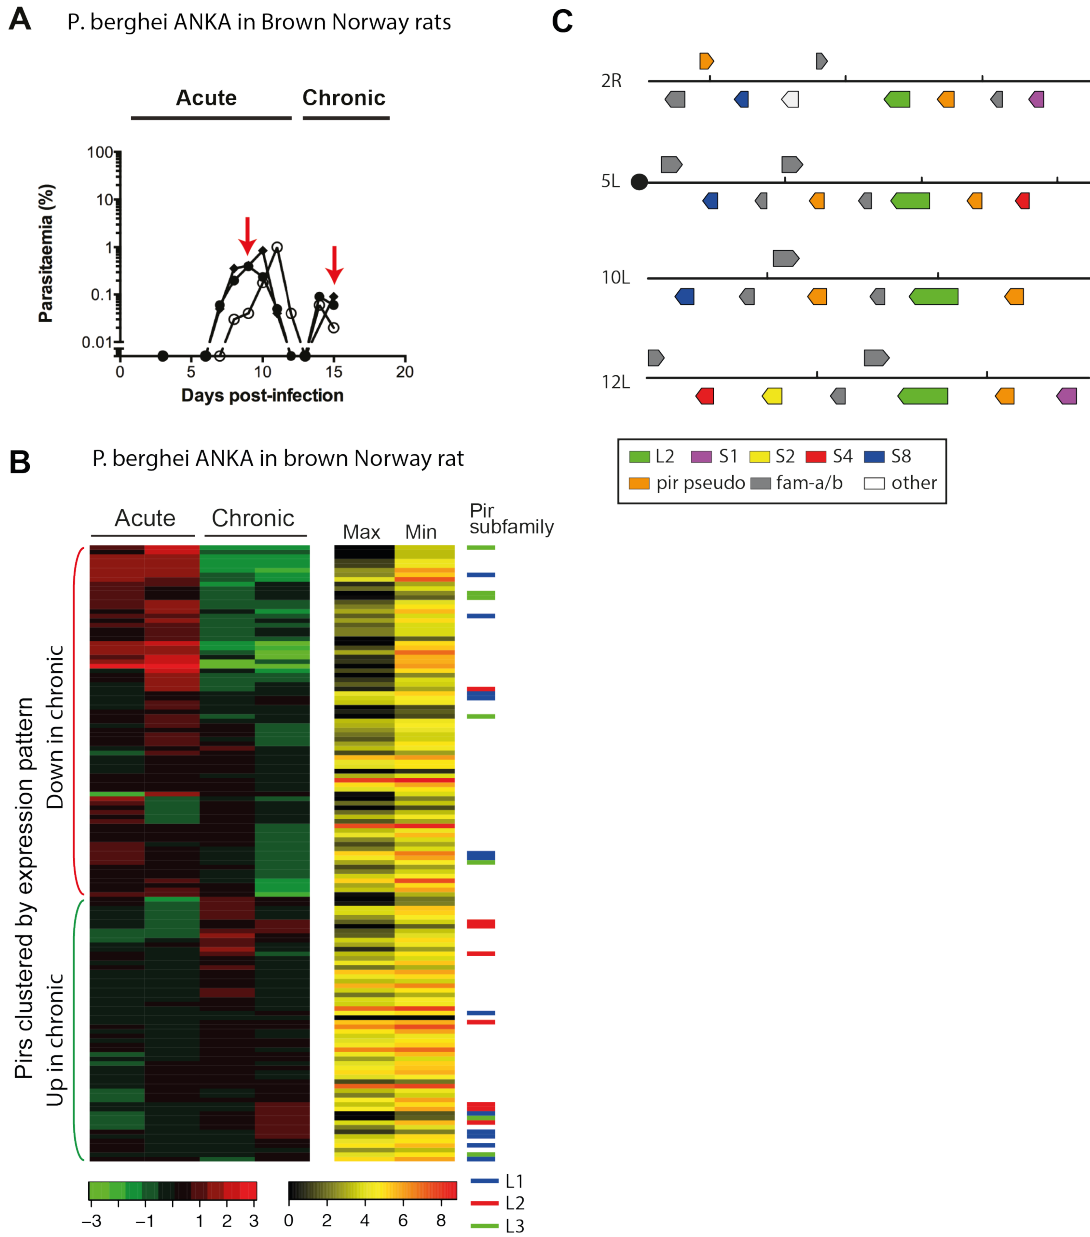

203

204 **Supplementary Figure 14. Chronic *pir* gene expression in *P. berghei*.**

205 (A) Course of infection of *P. berghei* ANKA in Brown Norway rats. Samples were taken  
 206 where indicated with a red arrow. (B) *P. berghei* has a significantly diverged repertoire of  
 207 *pir* genes from *P. chabaudi* and their arrangement in the subtelomeres did not allow  
 208 identification of gene clusters resembling *P. chabaudi* AAPs or ChAPs. However,

209 during chronic infection of brown rats with this species we observed a general reduced  
210 expression of *pir* genes. The small number which we could identify as more highly  
211 expressed in chronic infections were enriched for L2 *pirs*, rather than L1s as we saw in *P.*  
212 *chabaudi*. (C) The chronicity-associated L2s we observe in *P. berghei* are from a small  
213 number of highly similar loci, which in this respect, are reminiscent of *P. chabaudi*  
214 ChAPLs and AAPLs. Furthermore the *P. berghei* L2s have protein sequence features  
215 (long variable region, second putative transmembrane domain) more similar to *P.*  
216 *chabaudi* ChAPL L1s than *P. chabaudi* L2s. These results suggest that these L2 genes  
217 may perform the same function in *P. berghei* as the ChAPL L1s in *P. chabaudi*.



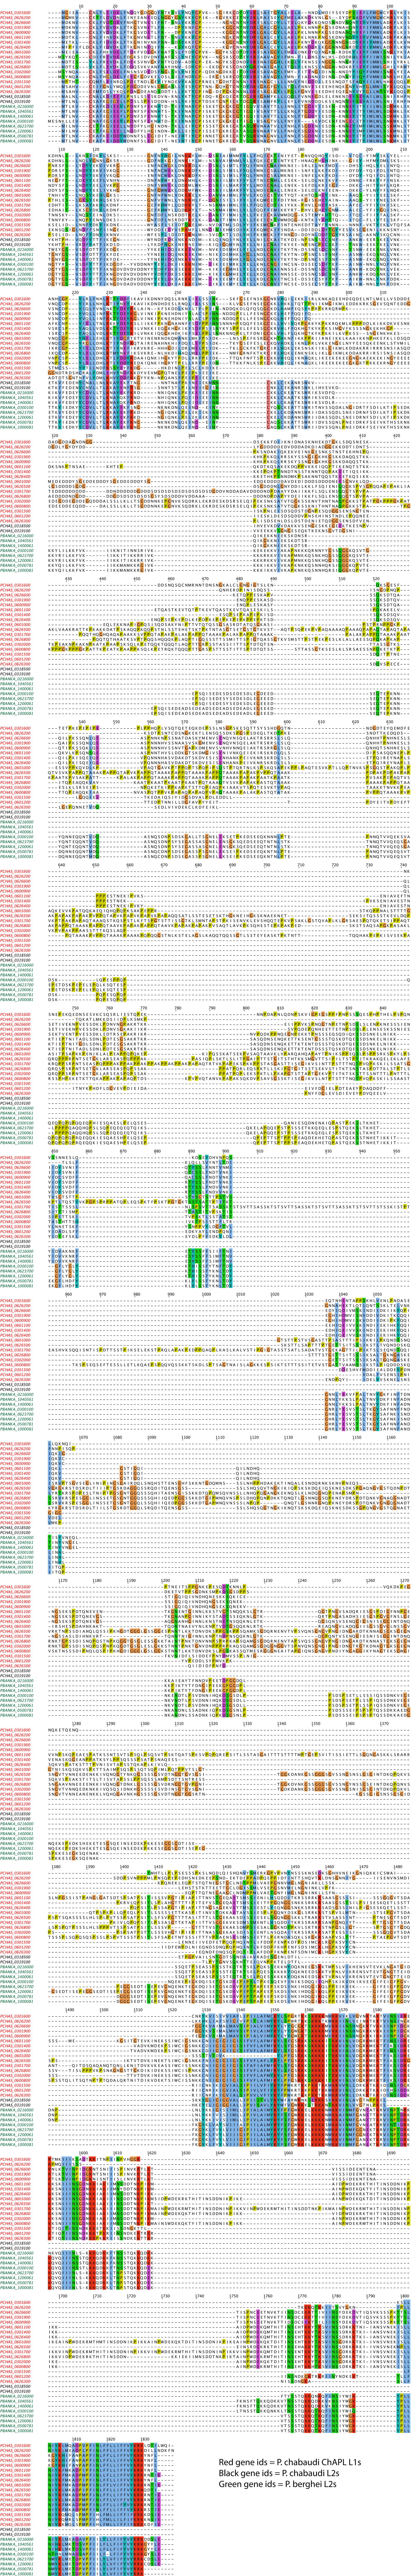

Red gene ids = *P. chabaudi* ChAPL L1s  
Black gene ids = *P. chabaudi* L2s  
Green gene ids = *P. berghei* L2s



218

219 **Supplementary Figure 15. Protein sequence alignment of *P. chabaudi* ChAPL L1**

220 ***pirs*, L2 *pirs* and *P. berghei* L2 *pirs*.**

221 *P. berghei* L2 *pirs* share several features with *P. chabaudi* ChAPL L1s. They are the

222 longest *pirs* in the respective genomes. This is due to a long, variable central domain

223 between the highly conserved N and C terminal domains as well as an extended C

224 terminal domain which contains a second putative transmembrane domain.

225

226 **Supplementary Tables**

227

228 **Supplementary Table 1. Lists of gene differentially expressed between acute and**  
 229 **chronic phases for WT, and KO parasites**

230 See Excel file “Supplementary Table 1”

231

232 **Supplementary Table 2.**

| Gene family              | Genes | DE between acute and chronic in wt mice (%) | Up/Down in chronic | Fold change range |
|--------------------------|-------|---------------------------------------------|--------------------|-------------------|
| <i>Pir</i>               | 210   | 118 (56%)                                   | 11/107             | -8.5 - +3.6       |
| <i>Fam-a</i>             | 145   | 35 (24%)                                    | 7/28               | -4.6 - +3.8       |
| <i>Lysophospholipase</i> | 29    | 6 (21%)                                     | 1/5                | -4.3 - +2.7       |
| <i>Fam-c</i>             | 22    | 3 (14%)                                     | 0/3                | -3.6 - +1.4       |
| <i>Fam-b</i>             | 27    | 3 (11%)                                     | 0/3                | -3.7 - -1.1       |
| <i>Fam-d</i>             | 21    | 0 (0%)                                      | 0/0                | n/a               |

233

234 **Supplementary Table 3. Comparison of v2 and v3 assemblies of the *Plasmodium***  
 235 ***chabaudi* AS nuclear genome.**

236

|                               | <i>P. chabaudi</i> AS v2 (9) | <i>P. chabaudi</i> AS v3 (this work) |
|-------------------------------|------------------------------|--------------------------------------|
| Assembly size (Mb)            | 18.83                        | 18.94                                |
| Contigs/chromosomes           | 37/14                        | 14/14                                |
| N50 (Mb)                      | 1.63                         | 1.63                                 |
| Gaps                          | 3                            | 0                                    |
| Telomeric sequences/telomeres | 14/28                        | 28/28                                |
| <i>Pir</i> genes              | 198                          | 212                                  |
| <i>Fam-a</i> genes            | 134                          | 145                                  |

237

238

239



240 **Supplementary Table 4. List of genes belonging to AAPL and ChAPL gene clusters.**

241 Clusters were defined as those pir genes coexpressed across acute and chronic phases  
 242 within a particular subtelomere, plus any pir genes not coexpressed, but between  
 243 coexpressed pirs. These extra genes can be identified by a 'No' in the 'Coexpressed'  
 244 column.

| <b>Locus type</b> | <b>Locus name</b> | <b>Gene id</b> | <b>Pir subfamily</b> | <b>Coexpressed?</b> |
|-------------------|-------------------|----------------|----------------------|---------------------|
| ChAPL             | 3L                | PCHAS_0300900  | L4                   | Yes                 |
|                   |                   | PCHAS_0301100  | L4                   | Yes                 |
|                   |                   | PCHAS_0301200  | L4                   | Yes                 |
|                   |                   | PCHAS_0301400  | L1                   | Yes                 |
|                   |                   | PCHAS_0301500  | L1                   | Yes                 |
|                   |                   | PCHAS_0301600  | L1                   | Yes                 |
|                   |                   | PCHAS_0301700  | L1                   | Yes                 |
|                   |                   | PCHAS_0301800  | L4                   | Yes                 |
|                   |                   | PCHAS_0301900  | L1                   | Yes                 |
|                   |                   | PCHAS_0302000  | L1                   | Yes                 |
|                   |                   | PCHAS_0302100  | L4                   | Yes                 |
| ChAPL             | 6L                | PCHAS_0600700  | L1                   | Yes                 |
|                   |                   | PCHAS_0600800  | L1                   | Yes                 |
|                   |                   | PCHAS_0600900  | L1                   | Yes                 |
|                   |                   | PCHAS_0601000  | L1                   | Yes                 |
|                   |                   | PCHAS_0601100  | L1                   | Yes                 |
|                   |                   | PCHAS_0601200  | L1                   | Yes                 |
| ChAPL             | 6R                | PCHAS_0626200  | L1                   | Yes                 |
|                   |                   | PCHAS_0626300  | L1                   | Yes                 |
|                   |                   | PCHAS_0626400  | L1                   | Yes                 |
|                   |                   | PCHAS_0626500  | L1                   | Yes                 |
|                   |                   | PCHAS_0626600  | L1                   | Yes                 |
|                   |                   | PCHAS_0626700  | L4                   | Yes                 |
|                   |                   | PCHAS_0626800  | L1                   | Yes                 |
|                   |                   | PCHAS_0626900  | L4                   | Yes                 |
|                   |                   | PCHAS_0627100  | L4                   | Yes                 |
| AAPL              | 2L                | PCHAS_0200011  | L4                   | Yes                 |
|                   |                   | PCHAS_0200015  | S7                   | Yes                 |
|                   |                   | PCHAS_0200021  | S1                   | Yes                 |
|                   |                   | PCHAS_0200025  | S7                   | Yes                 |
|                   |                   | PCHAS_0200031  | L4                   | Yes                 |
| AAPL              | 3R                | PCHAS_0319600  | L4                   | Yes                 |
|                   |                   | PCHAS_0319700  | S7                   | Yes                 |

|      |     |               |    |     |
|------|-----|---------------|----|-----|
|      |     | PCHAS_0319800 | S7 | No  |
|      |     | PCHAS_0319900 | S7 | No  |
|      |     | PCHAS_0320000 | S7 | Yes |
|      |     | PCHAS_0320100 | L4 | Yes |
|      |     | PCHAS_0320200 | S1 | Yes |
| AAPL | 4L  | PCHAS_0400111 | S1 | Yes |
|      |     | PCHAS_0400121 | L4 | Yes |
|      |     | PCHAS_0400200 | S7 | Yes |
|      |     | PCHAS_0400300 | S7 | Yes |
|      |     | PCHAS_0400400 | S7 | Yes |
|      |     | PCHAS_0400500 | L4 | Yes |
| AAPL | 12L | PCHAS_1200200 | S7 | Yes |
|      |     | PCHAS_1200300 | L4 | Yes |
|      |     | PCHAS_1200400 | S7 | Yes |
|      |     | PCHAS_1200500 | S7 | Yes |
|      |     | PCHAS_1200600 | S7 | Yes |
|      |     | PCHAS_1200700 | S7 | Yes |
| AAPL | 13R | PCHAS_1370900 | L1 | Yes |
|      |     | PCHAS_1371100 | L1 | Yes |
|      |     | PCHAS_1371200 | S7 | Yes |
|      |     | PCHAS_1371300 | S7 | Yes |
|      |     | PCHAS_1371400 | S7 | Yes |
|      |     | PCHAS_1371500 | S1 | No  |
|      |     | PCHAS_1371600 | S7 | Yes |

246 **Supplementary Table 5. Expression levels of *pir* genes during chronic and acute**  
247 **stages of infections of wild type mice, B6 $\mu$ MT, B6.TCR $\alpha$ -/- mice with *P. chabaudi***  
248 **AS, wild type mice with *P. chabaudi* CB, brown rat with *P. berghei* and**  
249 ***Grammomyms surdaster* with *P. chabaudi* AS.**

250 See Excel file “Supplementary Table 5.xlsx”.

251

252 **Supplementary Table 6. Expression levels of *pir* genes in cloned parasite lines**

253 See Excel file “Supplementary Table 6.xlsx”.

254

255 **Supplementary Table 7. Genes where expression level during the acute phase was**  
256 **correlated with the time at recrudescence.**

257 See Excel file “Supplementary Table 7.xlsx”.

258

259 **Supplementary Table 8. Primer sequences used to verify integration of plasmid**  
260 **constructs.**

| <b>Primer</b> | <b>Sequence</b>         |
|---------------|-------------------------|
| P1            | TATCTATAAGGGAAGATACTCAT |
| P2            | GTAAAGGGTTAATTCTTATATG  |
| P3            | CTTCTATGTTGGATACTTTGC   |

261

262

263 **Supplementary Table 9. Differentially expressed *pir* genes in *P. berghei* chronic**  
 264 **infections.** We compared both acute and both chronic samples with an FDR < 0.1 and  
 265 then both acute samples against each of the chronic samples individually with the same  
 266 cutoff. This allowed for that fact that we have relatively few replicates and therefore low  
 267 statistical power as well as that we expect *pir* changes not to be consistent between  
 268 replicates as this is what we observed in *P. chabaudi*. We find that while L2s are always  
 269 upregulated in chronic infection, they are never downregulated.

270

|                             | <b>Pir subfamily</b> | <b>Acute vs. Chronic</b> | <b>Acute vs. Chronic 1</b> | <b>Acute vs. Chronic 2</b> |
|-----------------------------|----------------------|--------------------------|----------------------------|----------------------------|
| <i>Pirs</i> up in chronic   | Pseudogenes          | 1                        | 2                          | 1                          |
|                             | L1                   |                          |                            | 1                          |
|                             | L2                   | 1                        | 1                          | 4                          |
|                             | L3                   |                          |                            |                            |
|                             | S1                   |                          | 2                          |                            |
|                             | S2                   |                          |                            |                            |
|                             | S4                   |                          |                            |                            |
|                             | S5                   |                          |                            |                            |
|                             | S8                   |                          | 1                          |                            |
| <i>Pirs</i> down in chronic | Pseudogenes          | 2                        | 2                          | 8                          |
|                             | L1                   | 4                        | 6                          | 4                          |
|                             | L2                   |                          |                            |                            |
|                             | L3                   | 1                        | 1                          | 1                          |
|                             | S1                   | 5                        | 5                          | 10                         |
|                             | S2                   | 4                        | 4                          | 6                          |
|                             | S4                   | 2                        | 2                          | 6                          |
|                             | S5                   |                          |                            |                            |
|                             | S8                   |                          | 1                          | 2                          |

271

272 **Supplementary Table 10. RNA-seq libraries used in the study.**

273 All samples are from blood stage parasites isolated at 11:00 (reverse light cycle), when >90% of the parasites were at the late  
 274 trophozoite stage of development. In the sample names T1 = acute phase and T2 = chronic phase, while numbers such as 21-1 refer to  
 275 a particular mouse, so T1\_21-1 and T2\_21-1 refer to acute and chronic phase samples from mouse 21-1. The library type column  
 276 describes the fragment size of the library e.g. 200-450bp, the number of PCR cycles e.g. 10 and the type of sequencing e.g. 100bp PE  
 277 = 100bp read lengths from both ends of the fragment. Description includes point of infection (acute = peak parasitaemia, chronic =  
 278 first recrudescence), host genotype (*Mus musculus* C57BL/6 B6.wt = wild type, B6.μMT<sup>-/-</sup>, B6.TCRa<sup>-/-</sup>; Gs = *Grammomys surdaster*;  
 279 Rn = *Rattus norvegicus*), and parasite isolate/species (AS = *P. c. chabaudi* AS; CB = *P. chabaudi* CB; Pb = *P. berghei* ANKA) and  
 280 clone name for the cloned samples.

281

| Sample name | Accession number | Library type          | Description      | Days post infection | % parasitaemia | % rings | % trophozoites | % schizonts | % gametocytes |
|-------------|------------------|-----------------------|------------------|---------------------|----------------|---------|----------------|-------------|---------------|
| T1_20-14    | ERS346505        | 200-450, 10, 100bp PE | Acute, B6.wt, AS | 9                   | 3.13           | 1       | 98             | 1           | 0             |
| T1_21-1     | ERS346506        | 200-450, 10, 100bp PE | Acute, B6.wt, AS | 9                   | 1.3            | 0       | 99             | 1           | 0             |
| T1_21-2     | ERS346508        | 200-450, 10, 100bp PE | Acute, B6.wt, AS | 9                   | 1.16           | 1       | 97             | 2           | 0             |
| T1_21-4     | ERS346513        | 200-450, 10, 100bp PE | Acute, B6.wt, AS | 9                   | 3.59           | 1.6     | 97.6           | 0.8         | 0             |
| T1_21-14    | ERS346519        | 200-450,              | Acute,           | 9                   | 1.95           | 8       | 89             | 3           | 0             |

|          |           |                             |                       |    |      |     |      |   |   |
|----------|-----------|-----------------------------|-----------------------|----|------|-----|------|---|---|
|          |           | 10,<br>100bp PE             | B6.wt, AS             |    |      |     |      |   |   |
| T2_20-14 | ERS346512 | 200-450,<br>10,<br>100bp PE | Chronic,<br>B6.wt, AS | 34 | 0.17 | 1   | 99   | 0 | 0 |
| T2_21-1  | ERS346510 | 200-450,<br>10,<br>100bp PE | Chronic,<br>B6.wt, AS | 43 | 0.2  | 4   | 96   | 0 | 0 |
| T2_21-2  | ERS346509 | 200-450,<br>10,<br>100bp PE | Chronic,<br>B6.wt, AS | 39 | 0.22 | 0   | 99   | 0 | 1 |
| T2_21-4  | ERS346504 | 200-450,<br>10,<br>100bp PE | Chronic,<br>B6.wt, AS | 32 | 0.62 | 1   | 98   | 0 | 1 |
| T2_21-14 | ERS346499 | 200-450,<br>10,<br>100bp PE | Chronic,<br>B6.wt, AS | 36 | 0.33 | 0   | 98   | 0 | 2 |
| T1_42-1  | ERS423636 | 200-450,<br>10,<br>100bp PE | Acute,<br>B6.wt, AS   | 9  | 8.8  | 1   | 99   | 0 | 0 |
| T1_42-7  | ERS423642 | 200-450,<br>10,<br>100bp PE | Acute,<br>B6.wt, AS   | 9  | 9    | 4.5 | 95.5 | 0 | 0 |
| T1_43-2  | ERS423654 | 200-450,<br>10,<br>100bp PE | Acute,<br>B6.μMT, AS  | 9  | 7.2  | 1.5 | 98.5 | 0 | 0 |
| T1_43-6  | ERS423656 | 200-450,<br>10,<br>100bp PE | Acute,<br>B6.μMT,     | 9  | 10.5 | 1   | 99   | 0 | 0 |
| T1_45-2  | ERS423647 | 200-450,                    | Acute,                | 9  | 2.64 | 0.5 | 99.5 | 0 | 0 |

|         |           |                             |                             |    |     |      |     |      |     |   |
|---------|-----------|-----------------------------|-----------------------------|----|-----|------|-----|------|-----|---|
|         |           | 10,<br>100bp PE             | B6.wt, AS                   |    |     |      |     |      |     |   |
| T1_45-6 | ERS423649 | 200-450,<br>10,<br>100bp PE | Acute,<br>B6.wt, AS         | 9  | 3.6 |      | 1.5 | 98.5 | 0   | 0 |
| T1_46-4 | ERS423657 | 200-450,<br>10,<br>100bp PE | Acute,<br>B6.μMT, AS        | 9  |     | 6.05 | 25  | 74.5 | 0.5 | 0 |
| T1_46-6 | ERS423638 | 200-450,<br>10,<br>100bp PE | Acute,<br>B6.μMT, AS        | 9  |     | 11.2 | 7.5 | 92.5 | 0   | 0 |
| T1_47-1 | ERS423644 | 200-450,<br>10,<br>100bp PE | Acute,<br>B6.TCRα-/-,<br>AS | 9  |     | 8.25 | 3   | 97   | 0   | 0 |
| T1_47-2 | ERS423650 | 200-450,<br>10,<br>100bp PE | Acute,<br>B6.TCRα-/-,<br>AS | 9  |     | 4.18 | 5   | 94.5 | 0.5 | 0 |
| T1_47-4 | ERS423655 | 200-450,<br>10,<br>100bp PE | Acute,<br>B6.TCRα-/-,<br>AS | 9  |     | 33.7 | 4.5 | 95.5 | 0   | 0 |
| T2_42-1 | ERS423640 | 200-450,<br>10,<br>100bp PE | Chronic,<br>B6.wt, AS       | 31 |     | 0.42 | 0   | 100  | 0   | 0 |
| T2_42-7 | ERS423637 | 200-450,<br>10,<br>100bp PE | Chronic,<br>B6.wt, AS       | 30 |     | 0.2  | 0   | 98   | 0   | 2 |
| T2_43-2 | ERS423645 | 200-450,<br>10,<br>100bp PE | Chronic,<br>B6.μMT, AS      |    | 52  | 3.2  | 0   | 100  | 0   | 0 |
| T2_43-3 | ERS423639 | 200-450,                    | Chronic,                    | 64 |     | 1.68 | 0.5 | 99   | 0.5 | 0 |

|         |           |                             |                                            |    |       |     |      |     |     |
|---------|-----------|-----------------------------|--------------------------------------------|----|-------|-----|------|-----|-----|
|         |           | 10,<br>100bp PE             | B6.μMT, AS                                 |    |       |     |      |     |     |
| T2_43-6 | ERS423648 | 200-450,<br>10,<br>100bp PE | Chronic,<br>B6.μMT, AS                     | 73 | 2.05  | 3   | 96.5 | 0   | 0.5 |
| T2_45-2 | ERS423641 | 200-450,<br>10,<br>100bp PE | Chronic,<br>B6.wt, AS                      | 33 | 0.12  | 0   | 100  | 0   | 0   |
| T2_45-4 | ERS423653 | 200-450,<br>10,<br>100bp PE | Chronic,<br>B6.wt, AS                      | 30 | 0.26  | 4   | 96   | 0   | 0   |
| T2_45-6 | ERS423658 | 200-450,<br>10,<br>100bp PE | Chronic,<br>B6.wt, AS                      | 34 | 0.21  | 2   | 98   | 0   | 0   |
| T2_46-4 | ERS423652 | 200-450,<br>14,<br>100bp PE | Chronic,<br>B6.μMT, AS                     | 59 | 1.1   | 2   | 97   | 0   | 1   |
| T2_46-6 | ERS423646 | 200-450,<br>10,<br>100bp PE | Chronic,<br>B6.μMT, AS                     | 33 | 0.26  | 4   | 96   | 0   | 0   |
| T2_47-1 | ERS423659 | 200-450,<br>10,<br>100bp PE | Chronic,<br>B6.TCRα <sup>-/-</sup> ,<br>AS | 30 | 6.26  | 4.5 | 95.5 | 0   | 0   |
| T2_47-2 | ERS423651 | 200-450,<br>10,<br>100bp PE | Chronic,<br>B6.TCRα <sup>-/-</sup> ,<br>AS | 30 | 12.54 | 0   | 100  | 0   | 0   |
| T2_47-4 | ERS423643 | 200-450,<br>14,<br>100bp PE | Chronic,<br>B6.TCRα <sup>-/-</sup> ,<br>AS | 30 | 29    | 2   | 96   | 1.5 | 0.5 |
| 53-1    | ERS792706 | 100-300,                    | Acute,                                     | 7  | 1.04  | 3   | 97   | 0   | 0   |



|      |           |                            |                                       |   |      |    |     |   |   |
|------|-----------|----------------------------|---------------------------------------|---|------|----|-----|---|---|
|      |           | 10, 75bp<br>PE             | B6.wt, AS,<br>clone f                 |   |      |    |     |   |   |
| 53-2 | ERS792707 | 100-300,<br>10, 75bp<br>PE | Acute, AS,<br>B6.wt, AS,<br>clone f   | 7 | 2.7  | 3  | 96  | 1 | 0 |
| 53-3 | ERS792708 | 100-300,<br>10, 75bp<br>PE | Acute, AS,<br>B6.wt, AS,<br>clone f   | 7 | 3.55 | 1  | 99  | 0 | 0 |
| 54-1 | ERS792709 | 100-300,<br>10, 75bp<br>PE | Acute, AS,<br>B6.wt, AS,<br>clone a   | 7 | 0.86 | 0  | 90  | 7 | 3 |
| 54-2 | ERS792710 | 100-300,<br>10, 75bp<br>PE | Acute, AS,<br>B6.wt, AS,<br>clone a   | 7 | 2.3  | 3  | 91  | 6 | 0 |
| 54-3 | ERS792711 | 100-300,<br>10, 75bp<br>PE | Acute, AS,<br>B6.wt, AS,<br>clone a   | 7 | 1.8  | 0  | 100 | 0 | 0 |
| 55-1 | ERS792712 | 100-300,<br>10, 75bp<br>PE | Acute, AS,<br>B6.wt, AS,<br>clone b   | 7 | 2.4  | 0  | 99  | 1 | 0 |
| 55-2 | ERS792713 | 100-300,<br>10, 75bp<br>PE | Acute, AS,<br>B6.wt, AS,<br>clone b   | 7 | 7.9  | 5  | 91  | 2 | 2 |
| 55-3 | ERS792714 | 100-300,<br>10, 75bp<br>PE | Acute, AS,<br>B6.wt, AS,<br>clone b   | 7 | 0.07 | 0  | 100 | 0 | 0 |
| 56-1 | ERS792715 | 100-300,<br>10, 75bp<br>PE | Chronic, AS,<br>B6.wt, AS,<br>clone k | 7 | 2    | 1  | 97  | 1 | 1 |
| 56-2 | ERS792716 | 100-300,                   | Chronic,                              | 7 | 2.2  | 21 | 73  | 5 | 1 |

|       |            |                            |                                   |   |      |  |      |      |     |     |
|-------|------------|----------------------------|-----------------------------------|---|------|--|------|------|-----|-----|
|       |            | 10, 75bp<br>PE             | B6.wt, AS,<br>clone k             |   |      |  |      |      |     |     |
| 56-3  | ERS792717  | 100-300,<br>10, 75bp<br>PE | Chronic,<br>B6.wt, AS,<br>clone k | 7 | 3.3  |  | 29   | 61   | 10  | 0   |
| 57-1  | ERS792718  | 100-300,<br>10, 75bp<br>PE | Chronic,<br>B6.wt, AS,<br>clone n | 7 | 0.67 |  | 4    | 90   | 4   | 2   |
| 57-2  | ERS792719  | 100-300,<br>10, 75bp<br>PE | Chronic,<br>B6.wt, AS,<br>clone n | 7 | 2.65 |  | 33   | 64   | 3   | 0   |
| 57-3  | ERS792720  | 100-300,<br>10, 75bp<br>PE | Chronic,<br>B6.wt, AS,<br>clone n | 7 | 3.4  |  | 5    | 90   | 3   | 2   |
| 58-1  | ERS792721  | 100-300,<br>10, 75bp<br>PE | Chronic,<br>B6.wt, AS,<br>clone p | 7 | 2.8  |  | 11   | 88   | 1   | 0   |
| 58-2  | ERS792722  | 100-300,<br>10, 75bp<br>PE | Chronic,<br>B6.wt, AS,<br>clone p | 7 | 14.7 |  | 1    | 98   | 0   | 1   |
| 58-3  | ERS792723  | 100-300,<br>10, 75bp<br>PE | Chronic,<br>B6.wt, AS,<br>clone p | 7 | 6.2  |  | 3    | 94   | 2   | 1   |
| MTCB1 | ERS1390889 | 100-300,<br>15, 75bp<br>PE | Acute,<br>B6.wt, CB               | 7 | 7.9  |  | 17.3 | 77.8 | 4.6 | 0.2 |
| MTCB2 | ERS1391216 | 100-300,<br>15, 75bp<br>PE | Acute,<br>B6.wt, CB               | 7 | 19.3 |  | 14.9 | 83.3 | 1.4 | 0.4 |
| MTCB3 | ERS1391219 | 100-300,                   | Acute,                            | 7 | 7.4  |  | 17.6 | 81.6 | 0.6 | 0.2 |

|          |            |                            |                       |    |       |     |      |      |   |
|----------|------------|----------------------------|-----------------------|----|-------|-----|------|------|---|
|          |            | 15, 75bp<br>PE             | B6.wt, CB             |    |       |     |      |      |   |
| MTCB4    | ERS1391221 | 100-300,<br>15, 75bp<br>PE | Acute,<br>B6.wt, CB   | 7  | 10.1  | 8.2 | 91.3 | 0.4  | 0 |
| MTCB5    | ERS1391557 | 100-300,<br>15, 75bp<br>PE | Acute,<br>B6.wt, CB   | 7  | 9.2   | 8.9 | 91.1 | 0    | 0 |
| MTCB6    | ERS1391598 | 100-300,<br>15, 75bp<br>PE | Acute,<br>B6.wt, CB   | 7  | 11.2  | 11  | 88.0 | 0.88 | 0 |
| T2_05_6  | ERS1348217 | 100-300,<br>10, 75bp<br>PE | Chronic,<br>B6.wt, CB | 59 | 0.09  | 0   | 100  | 0    | 0 |
| T2_05_10 | ERS1348218 | 100-300,<br>10, 75bp<br>PE | Chronic,<br>B6.wt, CB | 28 | 0.09  | 3   | 97   | 0    | 0 |
| 681_T1   | ERS1348224 | 100-300,<br>10, 75bp<br>PE | Acute, Gs,<br>AS      | 9  | 11    | 0   | 100  | 0    | 0 |
| 701_T1   | ERS1348225 | 100-300,<br>10, 75bp<br>PE | Acute, Gs,<br>AS      | 9  | 21.67 | 0   | 100  | 0    | 0 |
| 703_T1   | ERS1348226 | 100-300,<br>10, 75bp<br>PE | Acute, Gs,<br>AS      | 9  | 31    | 0   | 100  | 0    | 0 |
| 681_T2   | ERS1348227 | 100-300,<br>10, 75bp<br>PE | Chronic, Gs,<br>AS    | 27 | 1.6   | 0   | 100  | 0    | 0 |
| 701_T2   | ERS1348228 | 100-300,                   | Chronic, Gs,          | 27 | 2.5   | 0   | 100  | 0    | 0 |

|          |            |                            |                    |    |       |    |     |   |   |
|----------|------------|----------------------------|--------------------|----|-------|----|-----|---|---|
|          |            | 10, 75bp<br>PE             | AS                 |    |       |    |     |   |   |
| 703_T2   | ERS1348229 | 100-300,<br>10, 75bp<br>PE | Chronic, Gs,<br>AS | 27 | 2.5   | 0  | 100 | 0 | 0 |
| PbBN1_T1 | ERS1348206 | 100-300,<br>10, 75bp<br>PE | Acute, Rn,<br>Pb   | 10 | 0.69  | 20 | 80  | 0 | 0 |
| PbBN2_T1 | ERS1348207 | 100-300,<br>10, 75bp<br>PE | Acute, Rn,<br>Pb   | 10 | 1.36  | 20 | 79  | 0 | 1 |
| PbBN1_T2 | ERS1348208 | 100-300,<br>10, 75bp<br>PE | Chronic, Rn,<br>Pb | 15 | 0.06  | 30 | 70  | 0 | 0 |
| PbBN2_T2 | ERS1348209 | 100-300,<br>10, 75bp<br>PE | Chronic, Rn,<br>Pb | 15 | 0.0.9 | 30 | 70  | 0 | 0 |

282

283

284

285

286

287
